# Supplementary material for: Microenvironment alterations enhance photocurrents from photosystem I confined in supported lipid bilayers
Source: Royal Society of Chemistry journal article supplement (doi:10.1039/c8ta00898a), 2018-01-01
Supplement: c8ta00898a1.pdf [file c8ta00898a1.pdf]

## Supporting Information

### Microenvironment Alterations Enhance Photocurrents from Photosystem I Confined in Supported Lipid Bilayers

Hanieh Niroomand,<sup>†, #, §</sup> Ravi Pamu,<sup>‡, §</sup> Dibyendu Mukherjee,<sup>\*, †, #, ‡, §</sup> and Bamin Khomami<sup>\*, †, #, ‡</sup>

<sup>†</sup>Sustainable Energy Education and Research Center (SEERC); <sup>§</sup>Nano-Biomaterials Laboratory for Energy, Energetics & Environment (nbml-E<sup>3</sup>), <sup>#</sup>Department of Chemical & Biomolecular Engineering; <sup>‡</sup>Department of Mechanical, Aerospace & Biomedical Engineering, University of Tennessee, Knoxville

#### Corresponding Author

\*Bamin Khomami; Phone: (865) 974-2421; Fax: (865) 974-7076; E-mail: [bkhomami@utk.edu](mailto:bkhomami@utk.edu)

\*Dibyendu Mukherjee; Phone: (865) 974-5309; Fax: (865) 974-5274; E-mail: [dmukherj@utk.edu](mailto:dmukherj@utk.edu)

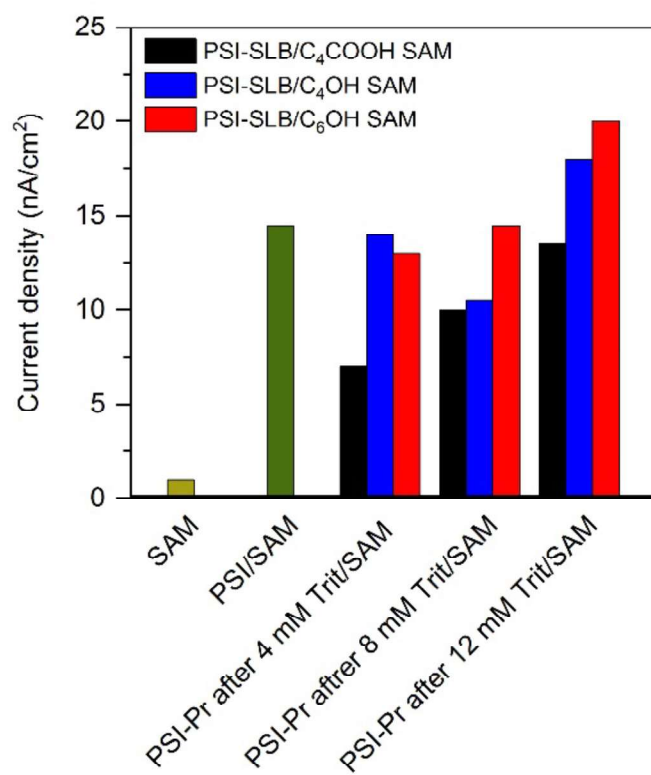

**Figure.S1** Comparisons for maximum photocurrent densities (nA/cm<sup>2</sup>) as obtained from chronoamperometry measurements on C<sub>4</sub>COOH/SAM (control) along with PSI-SLB on different SAM/Au substrates made from PSI-proteoliposomes reconstituted with different TX-100 concentration ( $C_{\text{trit}} = 4, 8$  and  $12$  Mm).

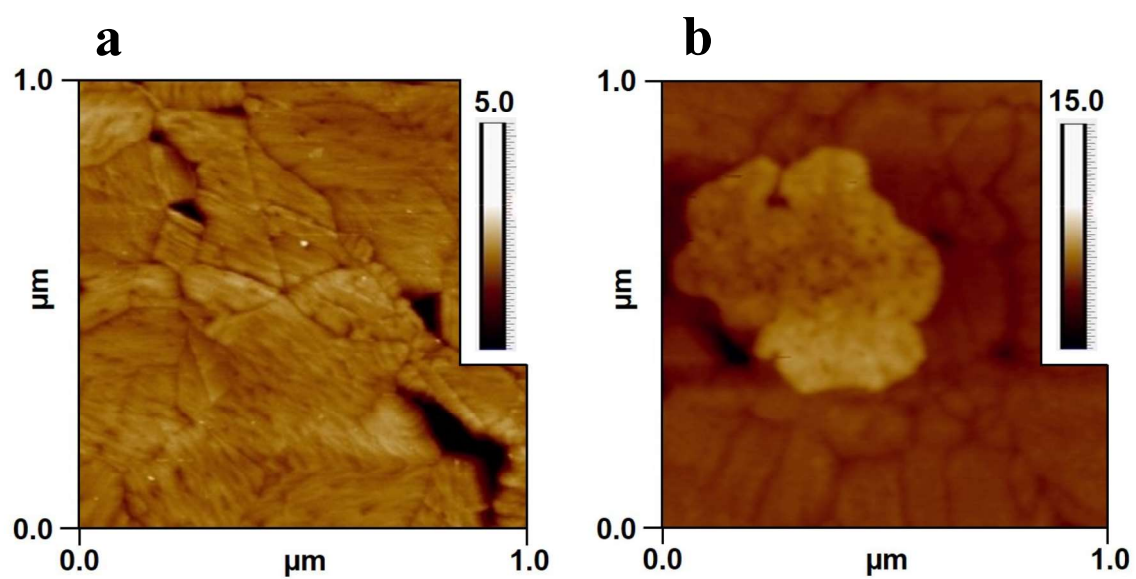

**Figure.S2** AFM images showing the surface topographies of: (a) flat gold and (b) DPhPG/Au.

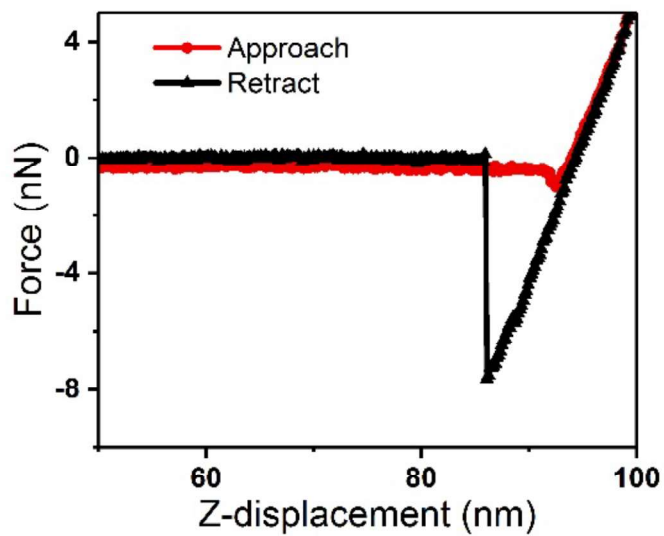

**Figure.S3** Typical approach-retract curves for on flat gold. The hydrophilic surface induces an attractive force of a few pN on approach and, upon retraction, a strong adhesive force of  $>4\text{nN}$ . Force-distance curve shows no breakthrough. Multiple force-distance curves were obtained on bare gold that were used to calibrate the system to generate the inverse optical lever sensitivity of our forced spectroscopy system as  $61.714\text{ nm/nA}$ .
